# Supplementary material for: Postnatal Expansion of the Pancreatic β-Cell Mass Is Dependent on Survivin
Source: Oxford University Press journal article supplement (doi:10.2337/db08-0170), 2008-07-04
Supplement: db08-01701_suppl.doc [file db08-01701_suppl.doc]

**
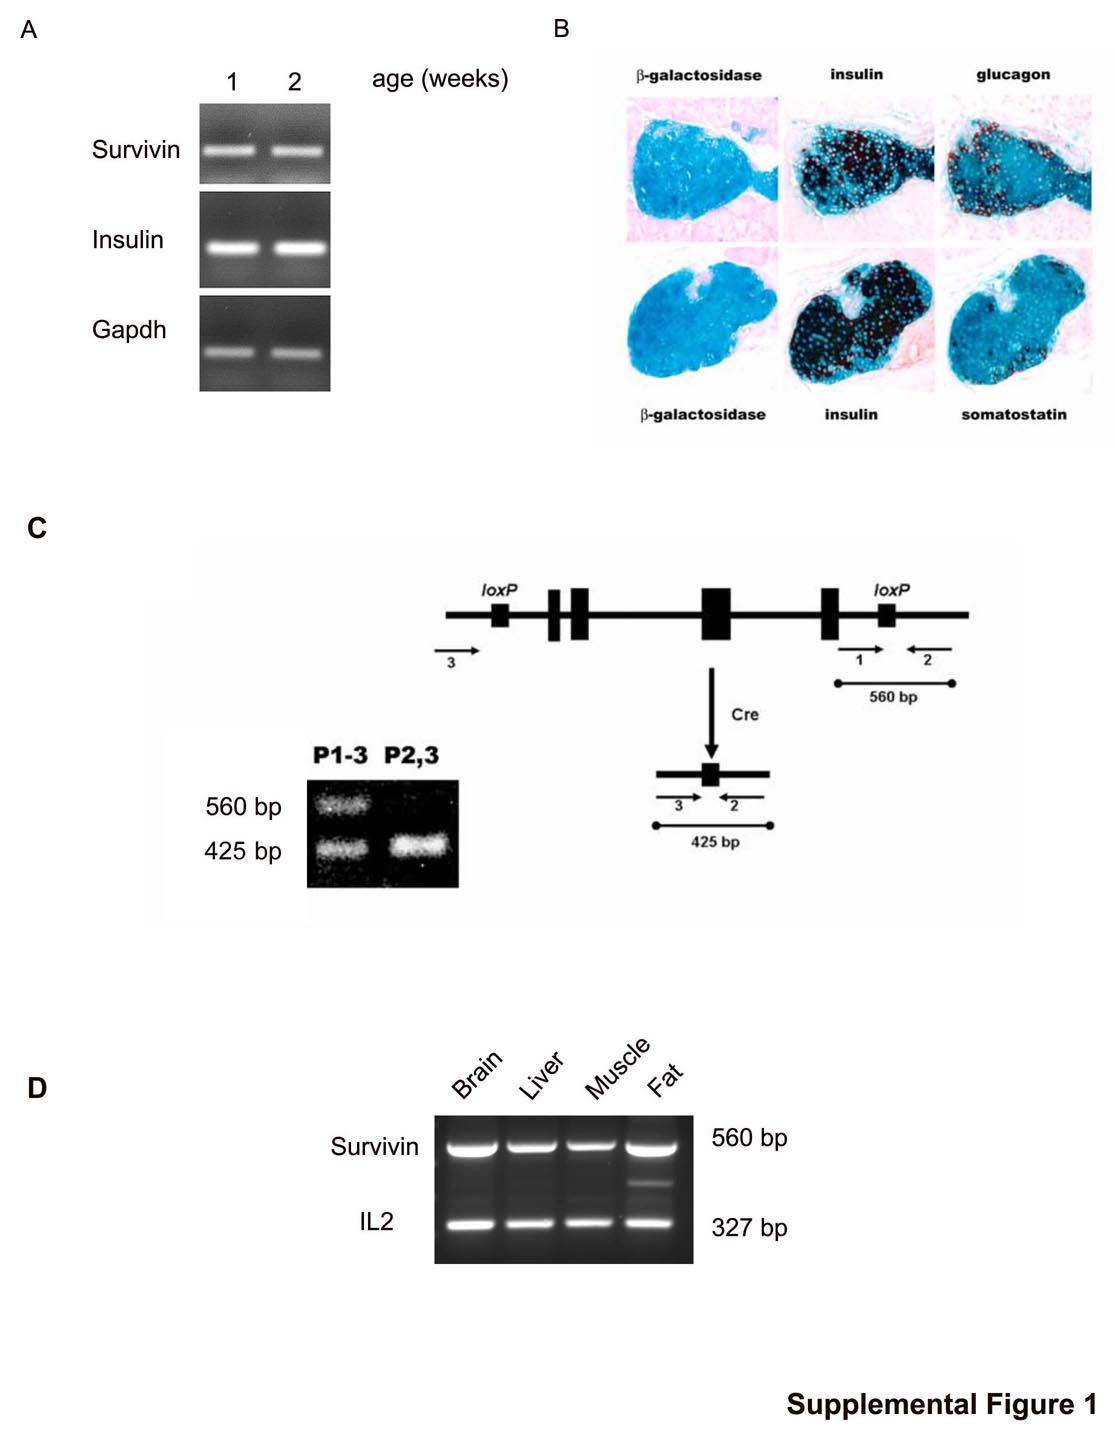
Supplementary Figure 1.** Characterization of survivin expression and deletion analysis. (*A*) Expression of survivin in normal pancreatic islets. RNA was prepared from islet cells isolated from wild-type mice at 1 and 2 weeks of age. *Survivin* expression was determined by semi-quantitative PCR and compared with *insulin* and *Gapdh*. (*B*) Expression of Cre-recombinase in Pax-6-Cre mice. Pancreatic tissue isolated from *Pax6-Cre+/-;Rosa26* reporter mice at P0 and P18 was stained with X-gal (see Methods) and with antibodies to insulin, glucagon, or somatostatin. Cre is coordinately expressed with these markers in the , and islet cells. Magnification = 20X. (*C*) Deletion of *survivin* in pancreatic islet cells isolated from *Pax-6Cre;survivinlox/lox* mice. Islet cells were dissected by laser capture microscopy and DNA prepared. PCR was performed using the indicated primers. The major PCR product was 425 bps (deleted product). P = primer. (*D*) *Survivin* gene is intact in tissues outside the endocrine pancreas. DNA was prepared from tissue isolated from brain, liver, muscle and fat of one month old *Pax-6Cre;survivinlox/lox* mice. PCR, performed as in (C), revealed an intact survivin gene (560 bp product) in all tissues. A minor band was observed at approximately 400 bp in fat which may represent a deleted gene product.

**
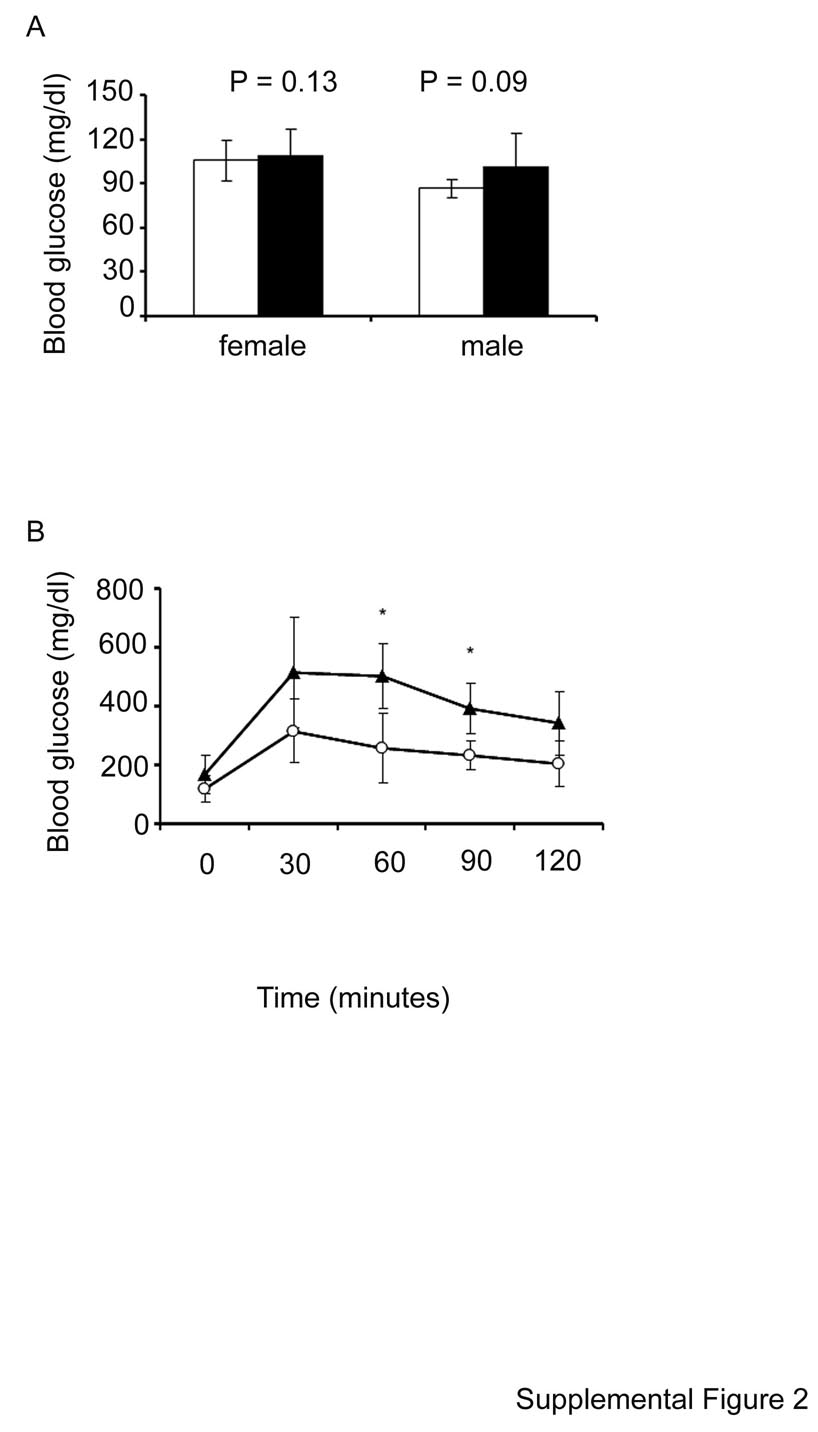
**

**Supplementary Figure 2.** Glucose metabolism in young and old mice lacking one endocrine-*survivin* allele. (A) Five week old *Pax-6Cre;survivinlox/+* mice (white bar, n = 4) and their littermate control (survivinlox/+) mice (black bar, n = 4) were fasted overnight and glucoses were measured in the morning. There were no statistically significant differences between the groups. (*B*) Seventeen week old *Pax-6Cre;survivinlox/+* mice (triangles, n = 4) and their littermate control (survivinlox/+) mice (circle, n = 5) were fasted for 5 hours then injected with 2 g/kg dextrose. The data are means ± SD. Asterisks denote significance at P < 0.05.

**
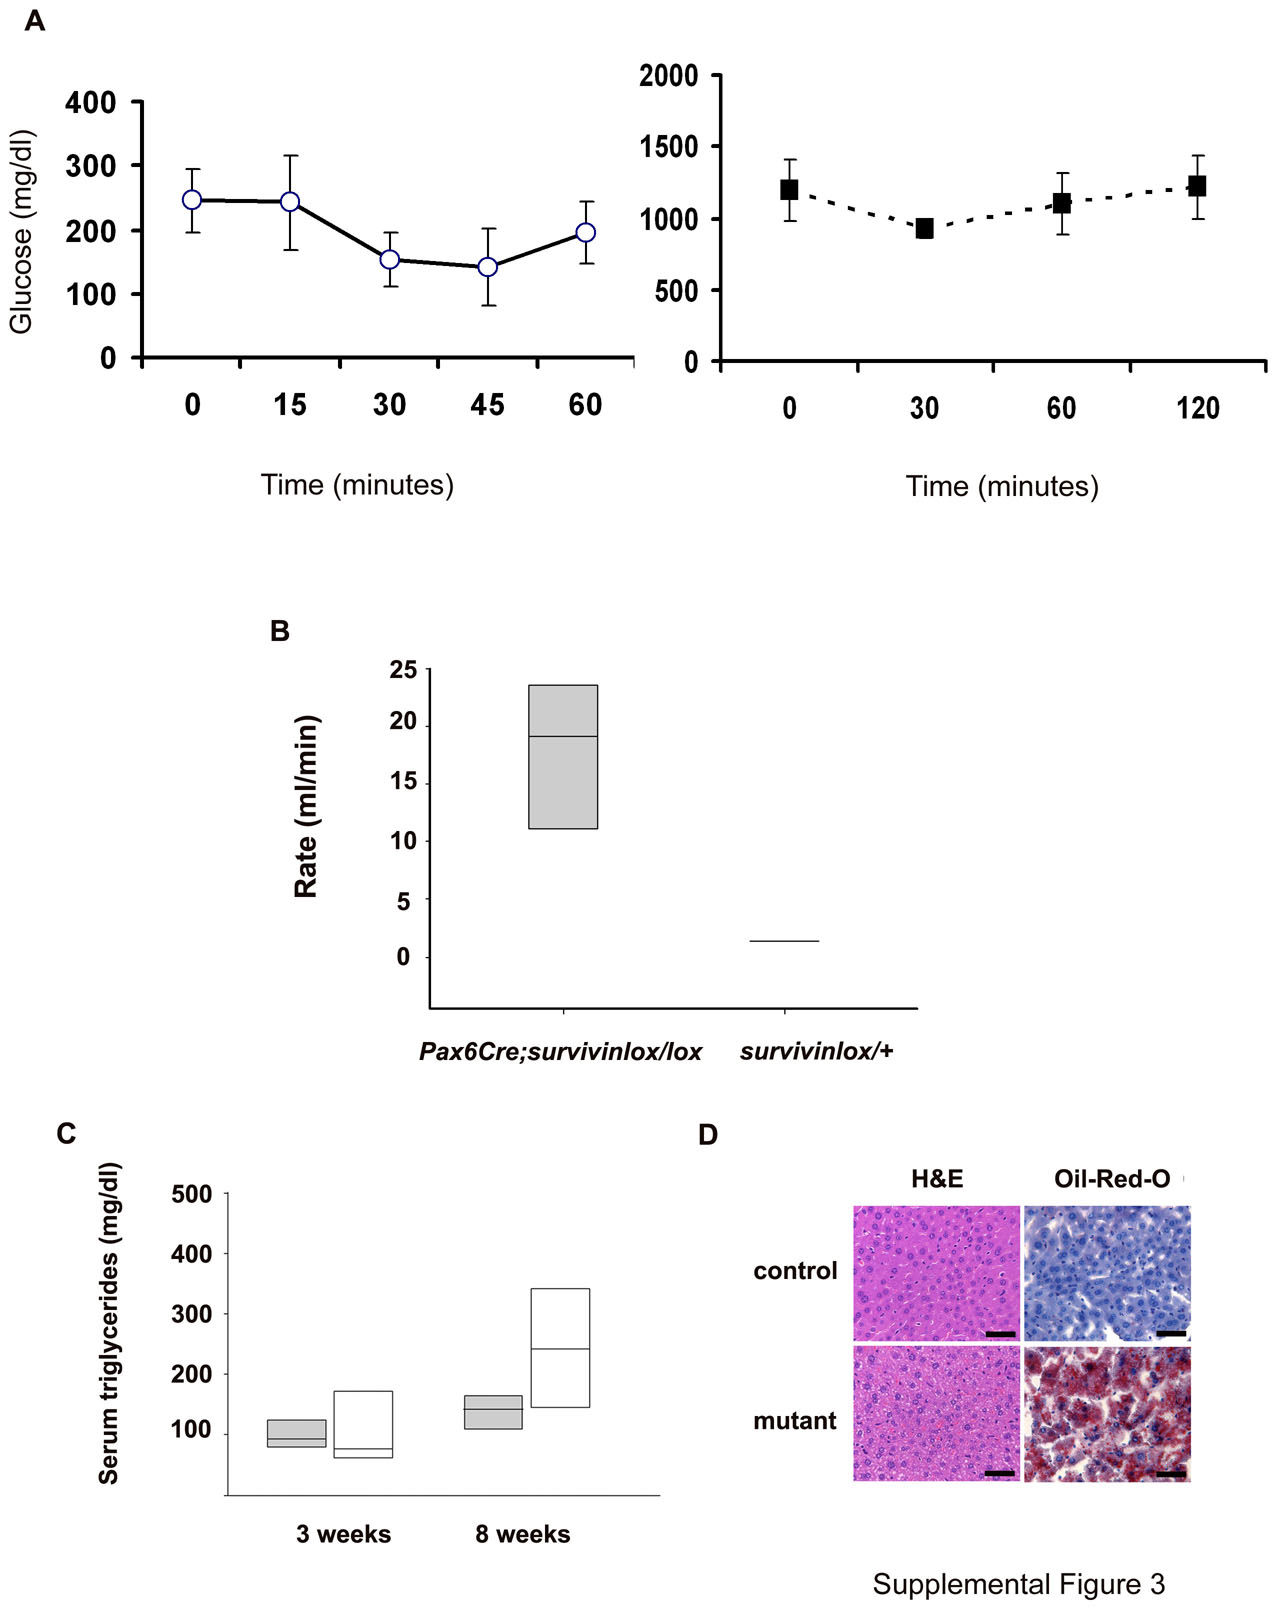
Supplementary Figure 3.** Late effects of prolonged hyperglycemia in *Pax-6Cre;survivinlox/lox* mice.(*A*)Response to exogenous insulin. Four-month-old *Pax-6Cre;survivinlox/lox* mice (squares, n = 4) and their littermate controls (circles, n = 10) were treated with humulin insulin (0.75 units/kg) in the fed state; glucose was measured at serial time points. The data are means ± SD. (*B*) Four-month old *Pax6-Cre;survivinlox/lox* mice (grey box, n = 4) and their littermate controls (solid bar, n = 2) were placed in metabolic cages with free access to water for 24 hr, during which time urine was collected and quantified. The results show the range and mean urine output in the 2 groups. (*C*) Serum triglycerides measured by enzymatic assay in Pax6*-Cre;survivinlox/lox* (white boxes) and littermate control (grey boxes) animals. The box plots show the range and mean serum triglyceride levels in the two groups at 3 and 8 weeks of age. (*D*) Livers from 5-month-old Pax6*-Cre;survivinlox/lox* mice and their littermate controls were sectioned and stained with H&E and Oil-red O. Red staining indicates accumulation of fat in the livers of the mutant animals. Bars = 50 m.

Supplemental Table 1: Serum insulin levels at various ages in littermate control (*survivinlox/lox*) and knockout (*Pax6Cre;survivinlox/lox*) animals as performed by ELISA (LINCO Research). Limit of sensitivity of the assay was 0.2 ng/ml.

| Animal # | Age (weeks) | Gender | genotype | insulin (ng/ml) | Log insulin |
| --- | --- | --- | --- | --- | --- |
| 1 | 3 | m | control | 0.59 | 0.201397 |
| 2 | 3 | m | control | 0.53 | 0.184691 |
| 3 | 3 | m | control | 0.695 | 0.22917 |
| 4 | 3 | m | control | 0.34 | 0.127105 |
| 5 | 3 | m | control | 0.091 | 0.037825 |
| 6 | 8 | m | control | 4.75 | 0.759668 |
| 7 | 8 | m | control | 0.815 | 0.258877 |
| 8 | 8 | f | control | 1.385 | 0.377488 |
| 9 | 8 | f | control | 0.72 | 0.235528 |
| 10 | 8 | f | control | 0.344 | 0.128399 |
| 11 | 10.5 | m | control | 1.37 | 0.374748 |
| 12 | 10.5 | m | control | 9.609 | 1.025674 |
| 13 | 10.5 | f | control | 0.353 | 0.131298 |
| 14 | 12 | f | control | 0.313 | 0.118265 |
| 15 | 16 | f | control | 0.965 | 0.293363 |
| 16 | 16 | f | control | 15.4 | 1.214844 |
|  |  |  |  |  |  |
| 1 | 3 | f | knockout | 0 | 0 |
| 2 | 3 | m | knockout | 0.071 | 0.029789 |
| 3 | 8 | f | knockout | 0.031 | 0.013259 |
| 4 | 8 | f | knockout | 0.0155 | 0.00668 |
| 5 | 8 | f | knockout | 0.06 | 0.025306 |
| 6 | 8 | f | knockout | 0.015 | 0.006466 |
| 7 | 8 | m | knockout | 0.0905 | 0.037626 |
| 8 | 8 | m | knockout | 0.0755 | 0.03161 |
| 9 | 10.5 | m | knockout | 0 | 0 |
| 10 | 12 | m | knockout | 0 | 0 |
| 11 | 12 | m | knockout | 0 | 0 |
| 12 | 12 | f | knockout | 0.015 | 0.006466 |

Supplemental Table 2: Mouse chemistries obtained at 11, 17, and 21 weeks of age in control (survivinlox/+) and knockout (*Pax6-Cre; survivinlox/lox*) mice.

svnl/l, *Pax-6Cre;survivinlox/lox*. P6-svn+/+, *Pax6-Cre;survivin+/+.* nd = none detected. na = not available. qns = quantity not sufficient. * mild elevations in serum glucoses observed in control animals are likely a result of anesthesia-induced hyperglycemia (Brown, E.T. *Visual Neuroscience*, 2005, 22, 615-618).

**SUPPLEMENTARY METHODS**

**Morphometry and islet mass.** For point counting morphometry, the relative pancreatic islet mass was represented as the ratio of islet area to total pancreatic area. The islet mass was calculated by multiplying the pancreatic weight by the relative pancreatic islet mass. The data were subjected to a two-way ANOVA, with the islet mass tested as a function of group and age, and then log transformed to adjust for heterogeneity of variance. A minimum of 4 animals in each group was used for the analysis of each time point. Levene’s test on the transformed variables was F = 0.65, p = 0.75. The p values for individual contrasts were adjusted for multiple comparisons with a modified Bonferonni test. For the rescue experiments, whole histological slides containing the pancreatic histological sections were scanned at a magnification of x200 using the automated ScanScope slide-scanning system (Aperio Technologies, Vista, CA). The resulting virtual/digital slides were stored in a PC and were fully controlled using the Spectrum Plus digital navigation program (Aperio). The Image Pro Plus 6.0 software (Media Cybernetics, MA) was used to calculate the area of the whole pancreatic sections as well as the area and the morphological shape descriptors of the beta islands. The results were expressed in mm2 for the areas and in mm for the diameters. The percent of the islet area relative to the total area of the pancreatic section were then calculated. Four control-rescue (*RIP-SVV*) and four ko-rescue (*Pax6-Cre;* RIP-SVV-*;survivinlox/lox*) animals were used for this analysis. Independent t-tests were used to assess significance.

**Caspase assays.**  Islet protein concentrations were quantified with Dc Protein Assay reagents (BioRad) then processed using a Caspase-GloTM Assay kit (Promega). Caspase activity was measured with a Victor 3 Multilabel Counter (Perkin Elmer). Measurements were performed in triplicate. Statistical analyses were performed using an unpaired t-test for comparisons between the means of two independent groups. A p-value of < 0.05 was considered significant.

**Flow cytometry.** Freshly isolated pancreatic islets were cultured overnight, digested, dispersed and fixed. Pellets were resuspended in PBS containing propidium iodide and RNaseA. Cell cycle analyses were performed with a Coulter EPICS XL flow cytometer.

**Real time PCR.** A mouse cell cycle RT² Profiler™ PCR Array (SuperArray Bioscience Corporation, # PAMM-020) was used to quantify the expression of the cell cycle genes. TaqMan analysis was carried out with a Bio-Rad Sequence Detection System. Standard deviations were based on the average of two independent experiments. Values were calculated using the 2-CT method (Bioscience Corporation).

**Laser capture microdissection and genotyping.** Pancreata from P0 and P18 were fixed and embedded in paraffin. Sections were cut, collected onto PEN membrane slides (Carl Zeiss) and stained with H&E. Pancreatic islets were dissected using the Zeiss Microlaser System supplied with PALM RoboSoftware version 1.2 and collected into a 0.5-ml cap. DNA was extracted with the Genomic DNA Purification kit (Gentra Systems).

**Metabolic Studies (continued).** Serum insulin was measured with an insulin ELISA kit (LINCO Research, Inc., Missouri). Serum glucagon was measured with theYK090 Glucagon EIA kit (Yanaihara Institute Inc., Shizuoka, Japan). Serum triglycerides were measured with InfinityTM (Thermo Electron, Melbourne, Australia). For the urine collection and analysis, mice were placed in a Nalgene metabolic cage (Nalgene Nunc International, Rochester, NY) with free access to water. The volume of urine was measured for 24 hr. The presence of glucose and ketones in urine was detected with urine test strips (Chemstrip uGK, Roche).
